# Supplementary material for: Development of a new DHFR-based destabilizing domain with enhanced basal turnover and applicability in mammalian systems
Source: bioRxiv or medRxiv preprint supplement (doi:10.1101/2022.06.21.495152), 2022-06-21

Fig. S1

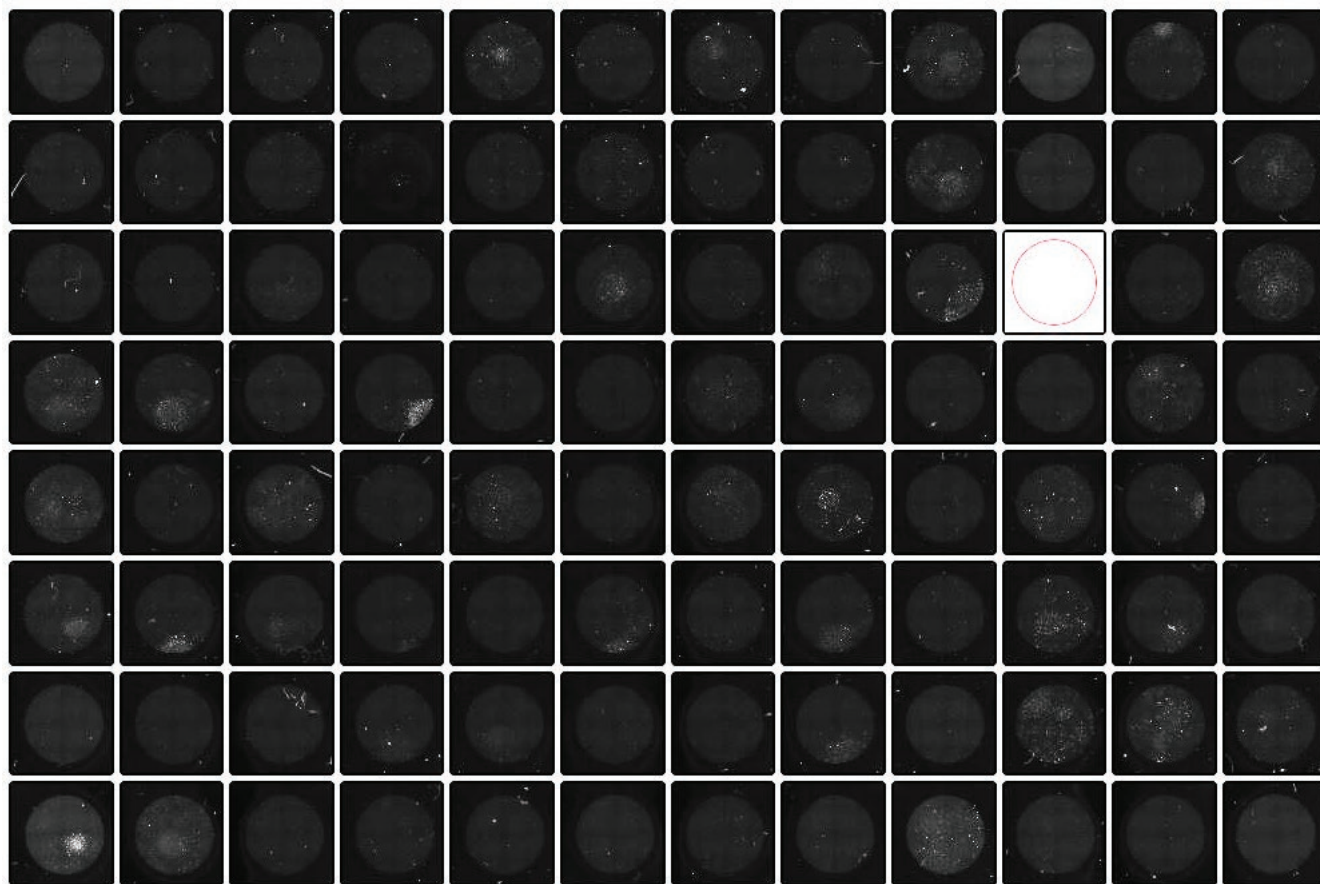

Fig. S2

**A**

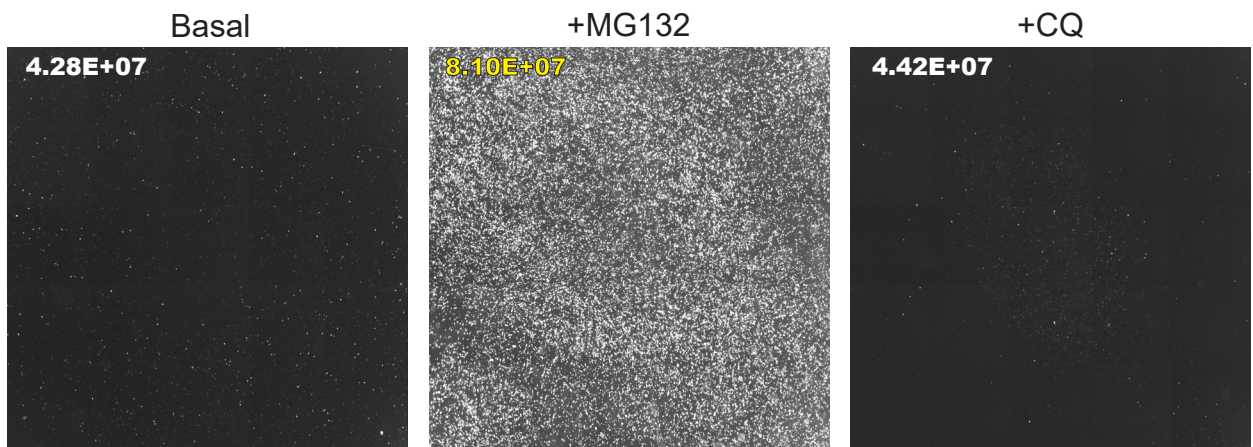

**B**

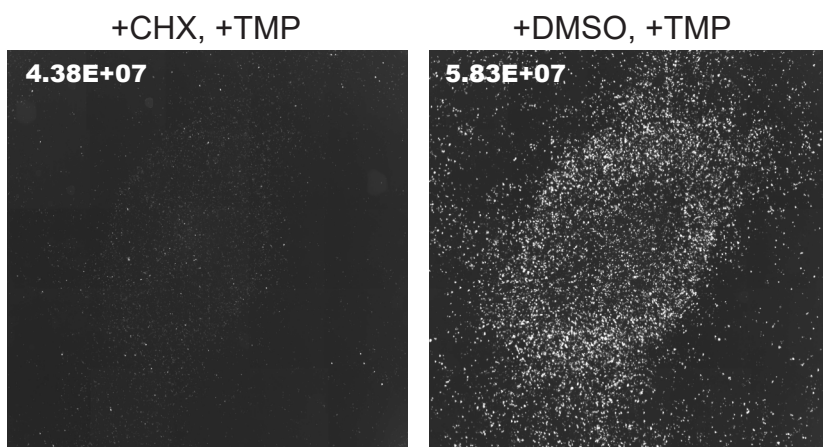

Fig. S3

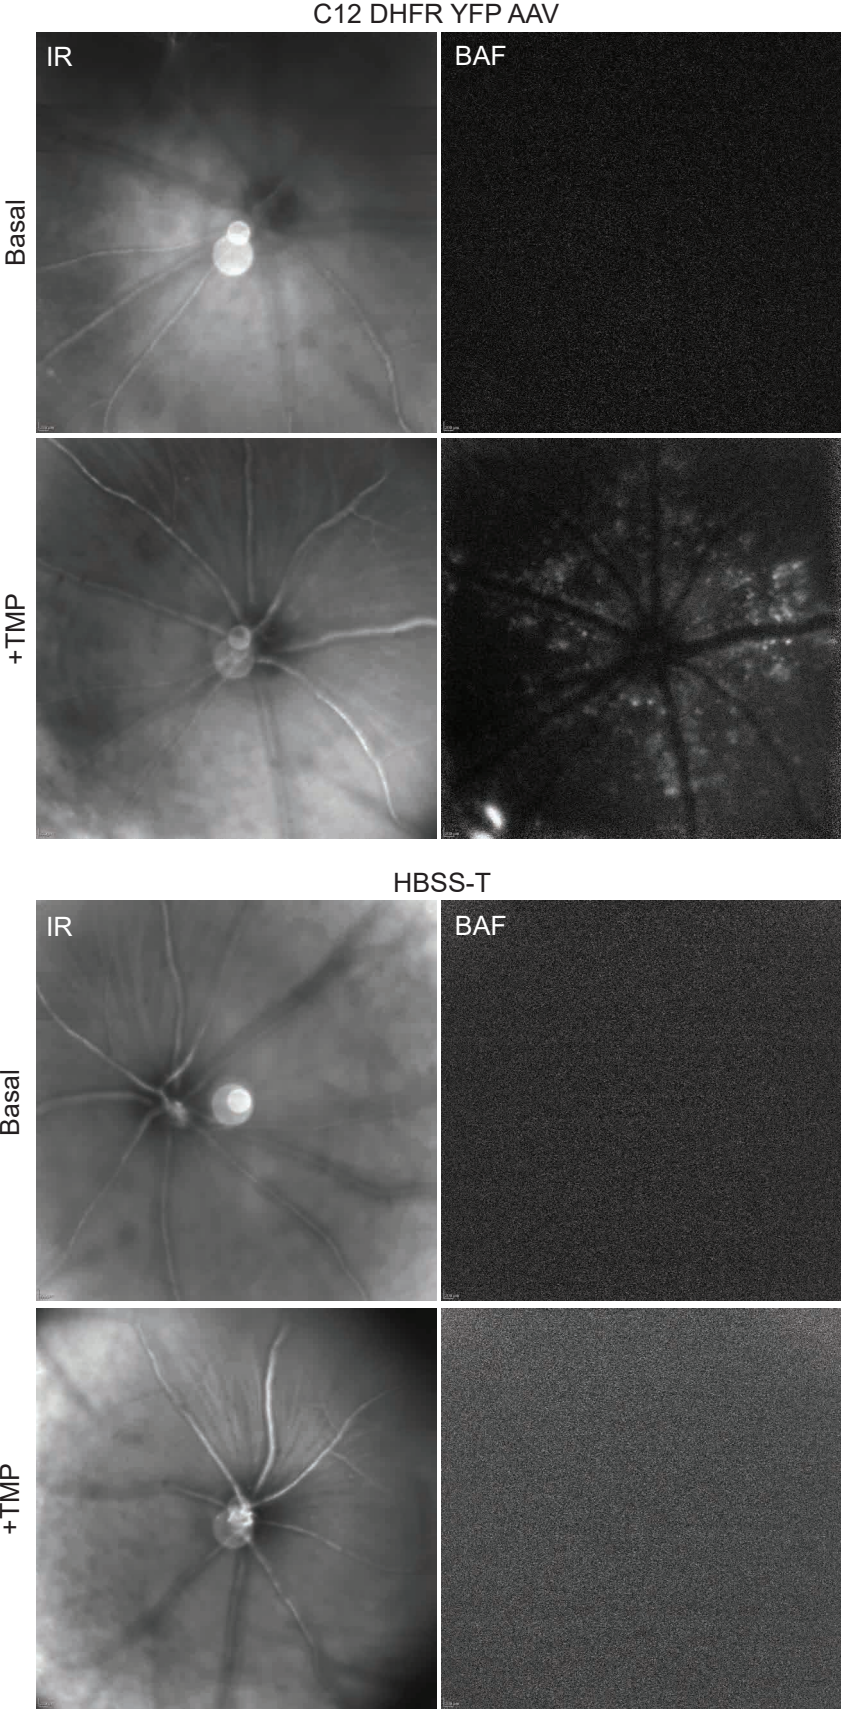

# Fig. S4

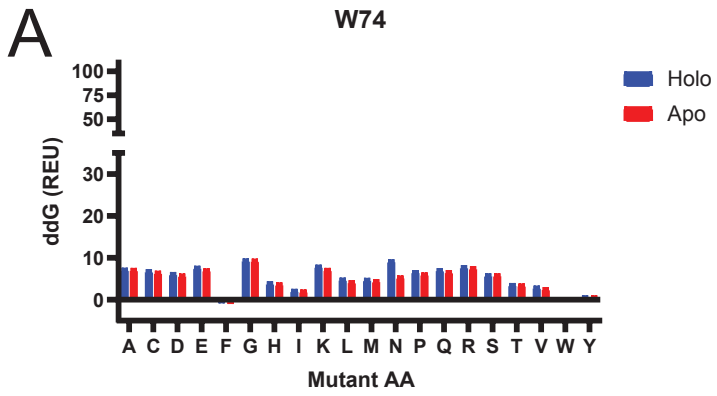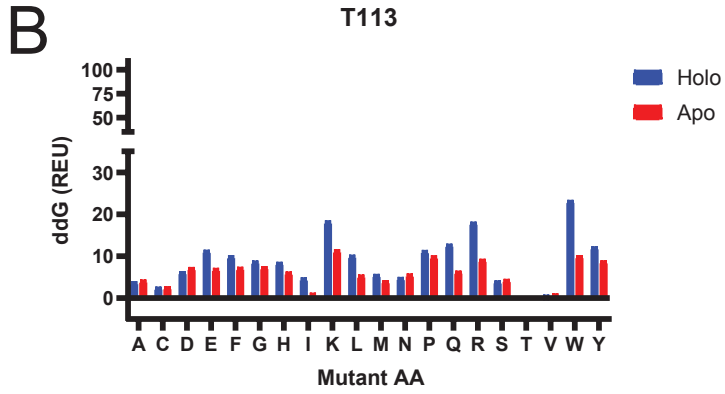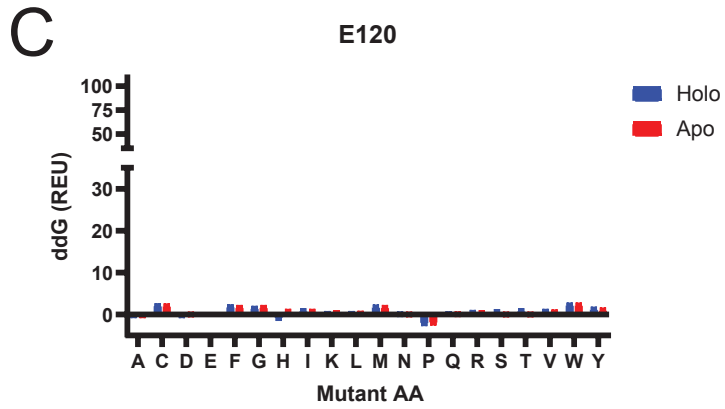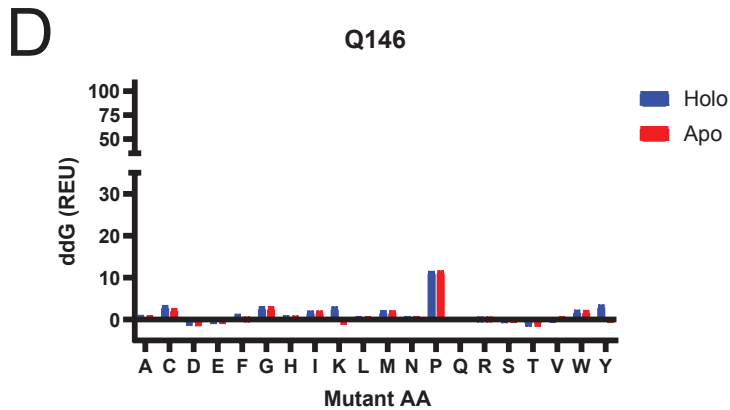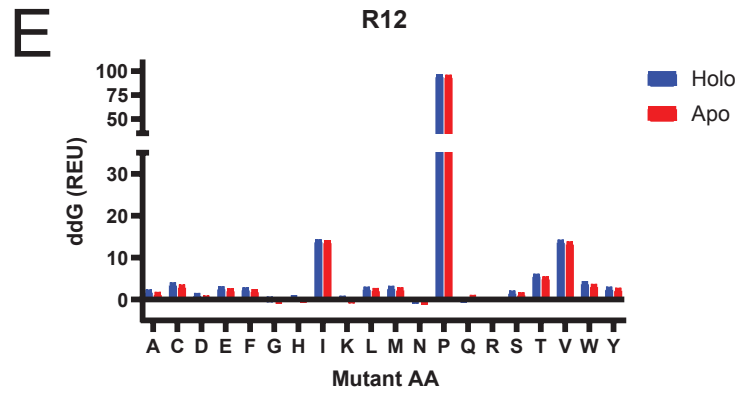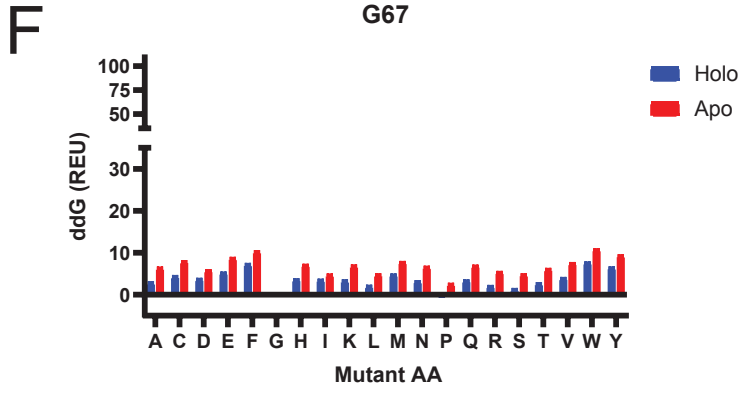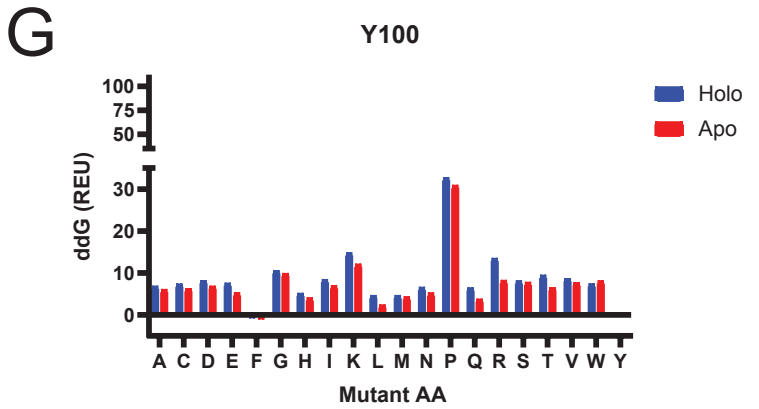



Fig. S5

A

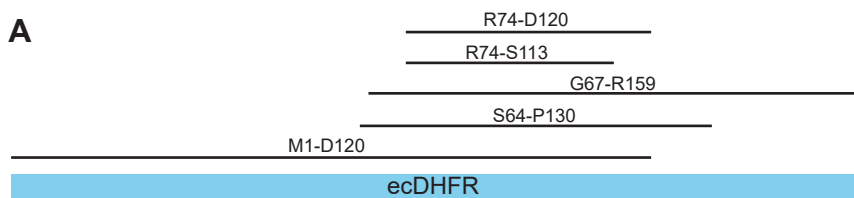

B

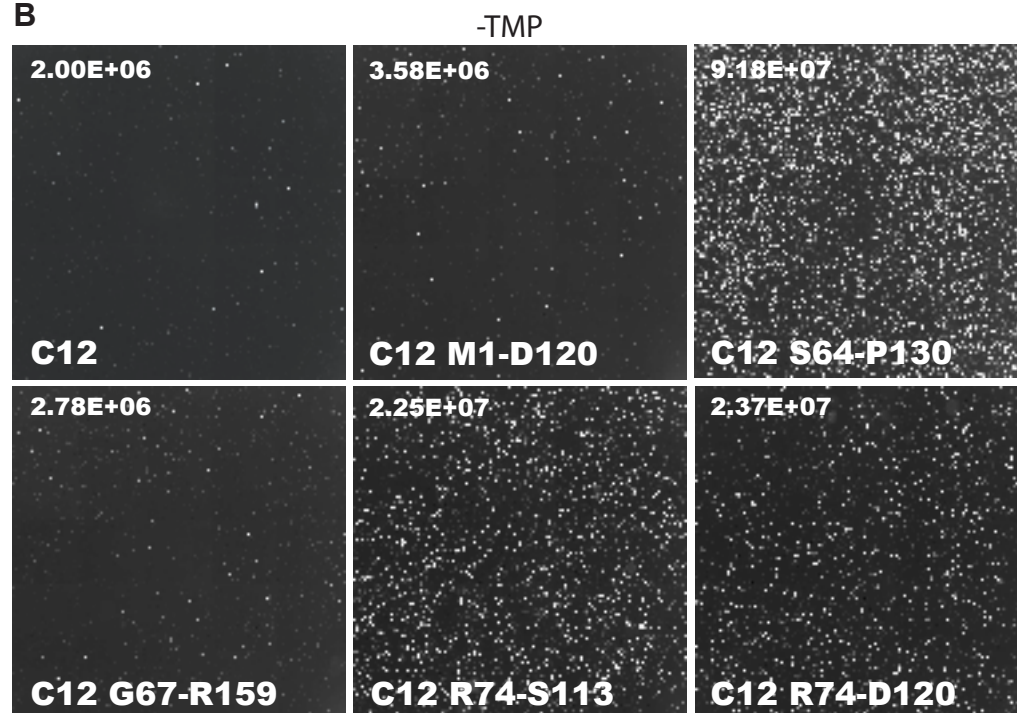

C

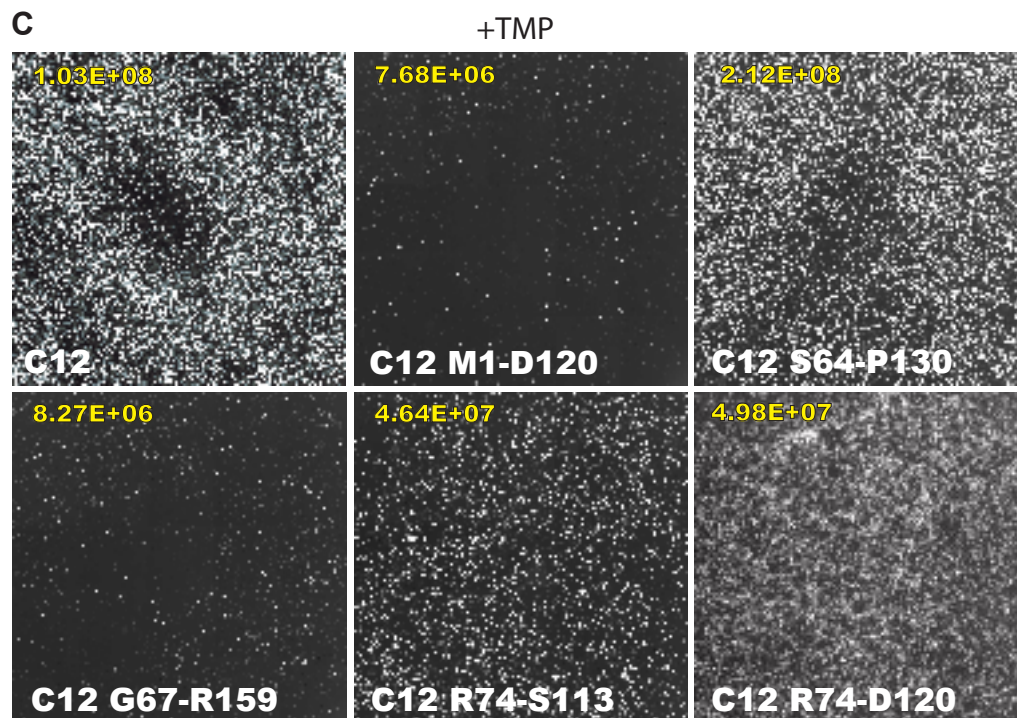

Supplement: Supplementary file [file media-1.pdf]
